# Supplementary material
Source: PubMed Central journal article supplement (PMC11192142)
Supplement: NIHMS1999766-supplement-Jia_PMID37433378_AmJPrevMed_2023_Suppl.pdf [file NIHMS1999766-supplement-Jia_PMID37433378_AmJPrevMed_2023_Suppl.pdf]

**Menu calorie label use and diet quality: a cross-sectional study**

Jenny Jia, Linda Van Horn, Jeffrey A. Linder, Ronald T. Ackermann, Namratha R. Kandula, Matthew J. O'Brien  
*American Journal of Preventive Medicine*

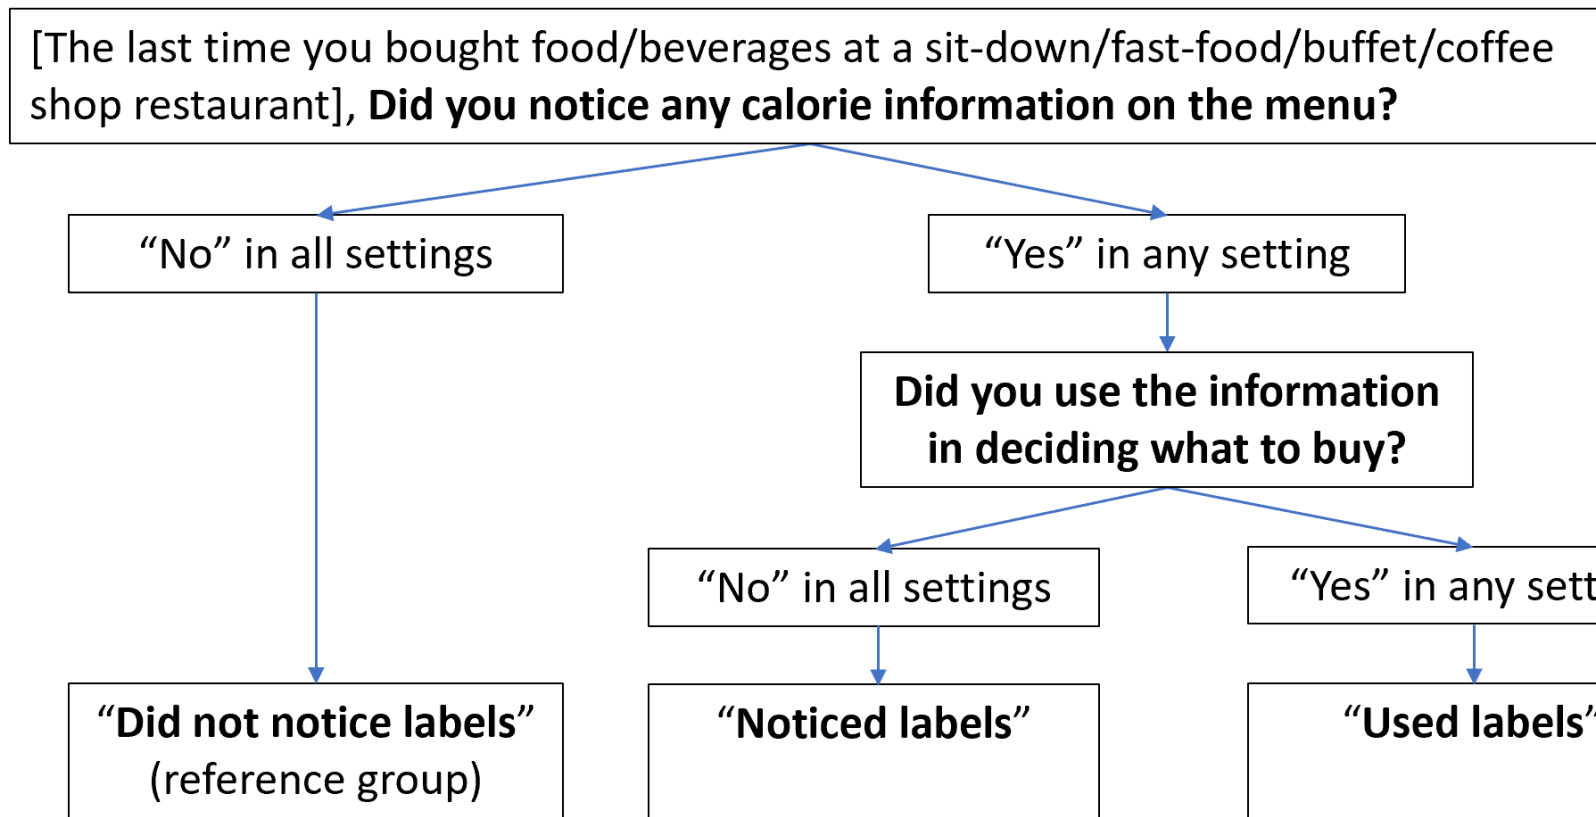

**Appendix Figure 1.** Flow chart of classification process of the exposure variable, menu calorie label use.
